# Supplementary material for: Boundary curvature guided programmable shape-morphing kirigami sheets
Source: PubMed Central journal article supplement (PMC8792031; doi:10.1038/s41467-022-28187-x), 2022-01-26
Supplement: 41467_2022_28187_MOESM3_ESM.pdf [file 41467_2022_28187_MOESM3_ESM.pdf]

## **Description of Additional Supplementary Files**

**File Name:** Supplementary Movie 1

**Description:** Demonstration of the mechanically actuated spheroidal, saddle, and cylindrical shape.

**File Name:** Supplementary Movie 2

**Description:** Demonstration of sequential snapping of the discrete ribbons in the circular precursor with attached magnetic polymers subject to a uniaxial tension ( $\times 1/8$  speed).

**File Name:** Supplementary Movie 3

**Description:** Demonstration of the kirigami gripper grasping various objects.
